# Supplementary material
Source: PubMed Central journal article supplement (PMC2907250)
Supplement: NIHMS214831-supplement-Supplemental_Table_1.pdf [file NIHMS214831-supplement-Supplemental_Table_1.pdf]

**Supplementary Table 1: A list of all pathways included in the study**

| <b>No.</b> | <b>Pathway source</b> | <b>Pathway name</b>                                                               | <b># genes</b> | <b>*p-value</b> |
|------------|-----------------------|-----------------------------------------------------------------------------------|----------------|-----------------|
| 1          | BioCarta              | The 4-1BB-dependent immune response                                               | 17             | 0.50589         |
| 2          | BioCarta              | Role of nicotinic acetylcholine receptors in the regulation of apoptosis          | 11             | 0.32105         |
| 3          | BioCarta              | Y branching of actin filaments                                                    | 11             | 0.20063         |
| 4          | BioCarta              | Agrin in Postsynaptic Differentiation                                             | 25             | 0.32947         |
| 5          | BioCarta              | Protein Kinase A at the Centrosome                                                | 12             | 0.11179         |
| 6          | BioCarta              | AKT Signaling Pathway                                                             | 18             | 0.86674         |
| 7          | BioCarta              | ALK in cardiac myocytes                                                           | 33             | 0.02484         |
| 8          | BioCarta              | Acute Myocardial Infarction                                                       | 13             | 0.13137         |
| 9          | BioCarta              | ADP-Ribosylation Factor                                                           | 16             | 0.01989         |
| 10         | BioCarta              | Oxidative Stress Induced Gene Expression Via Nrf2                                 | 17             | 0.61684         |
| 11         | BioCarta              | Tumor Suppressor Arf Inhibits Ribosomal Biogenesis                                | 12             | 0.10305         |
| 12         | BioCarta              | Antigen Dependent B Cell Activation                                               | 12             | 0.36684         |
| 13         | BioCarta              | Angiotensin II mediated activation of JNK Pathway via Pyk2 dependent signaling    | 27             | 0.04758         |
| 14         | BioCarta              | ATM Signaling Pathway                                                             | 19             | 0.10379         |
| 15         | BioCarta              | Role of BRCA1, BRCA2 and ATR in Cancer Susceptibility                             | 21             | 0.16611         |
| 16         | BioCarta              | Regulation of BAD phosphorylation                                                 | 15             | 0.50842         |
| 17         | BioCarta              | $\zeta$ -arrestins in GPCR Desensitization                                        | 11             | 0.47411         |
| 18         | BioCarta              | Roles of $\zeta$ -arrestin-dependent Recruitment of Src Kinases in GPCR Signaling | 18             | 0.45442         |
| 19         | BioCarta              | Role of $\zeta$ -arrestins in the activation and targeting of MAP kinases         | 14             | 0.55379         |
| 20         | BioCarta              | B Cell Survival Pathway                                                           | 12             | 0.68474         |
| 21         | BioCarta              | BCR Signaling Pathway                                                             | 26             | 0.09453         |
| 22         | BioCarta              | Bioactive Peptide Induced Signaling Pathway                                       | 30             | 0.44263         |
| 23         | BioCarta              | B Lymphocyte Cell Surface Molecules                                               | 11             | 0.70211         |
| 24         | BioCarta              | Effects of calcineurin in Keratinocyte Differentiation                            | 10             | 0.34979         |
| 25         | BioCarta              | Role of EGF Receptor Transactivation by GPCRs in Cardiac Hypertrophy              | 15             | 0.91305         |
| 26         | BioCarta              | CARM1 and Regulation of the Estrogen Receptor                                     | 25             | 0.81916         |
| 27         | BioCarta              | Caspase Cascade in Apoptosis                                                      | 23             | 0.39811         |
| 28         | BioCarta              | CBL mediated ligand-induced downregulation of EGF receptors                       | 11             | 0.43305         |

|    |          |                                                                                        |    |         |
|----|----------|----------------------------------------------------------------------------------------|----|---------|
| 29 | BioCarta | CCR3 signaling in Eosinophils                                                          | 21 | 0.20137 |
| 30 | BioCarta | Pertussis toxin-insensitive CCR5 Signaling in Macrophage                               | 13 | 0.68832 |
| 31 | BioCarta | Cadmium induces DNA synthesis and proliferation in macrophages                         | 14 | 0.44516 |
| 32 | BioCarta | Cell to Cell Adhesion Signaling                                                        | 10 | 0.21568 |
| 33 | BioCarta | Cyclins and Cell Cycle Regulation                                                      | 23 | 0.90263 |
| 34 | BioCarta | Ceramide Signaling Pathway                                                             | 21 | 0.49684 |
| 35 | BioCarta | Apoptotic Signaling in Response to DNA Damage                                          | 21 | 0.41642 |
| 36 | BioCarta | Classical Complement Pathway                                                           | 10 | 0.67105 |
| 37 | BioCarta | Complement Pathway                                                                     | 15 | 0.70526 |
| 38 | BioCarta | Transcription factor CREB and its extracellular signals                                | 17 | 0.10758 |
| 39 | BioCarta | Activation of Csk by cAMP-dependent Protein Kinase Inhibits Signaling through the T Ce | 17 | 0.84442 |
| 40 | BioCarta | CXCR4 Signaling Pathway                                                                | 22 | 0.80295 |
| 41 | BioCarta | Cytokine Network                                                                       | 20 | 0.23874 |
| 42 | BioCarta | D4-GDI Signaling Pathway                                                               | 13 | 0.17095 |
| 43 | BioCarta | Dendritic cells in regulating TH1 and TH2 Development                                  | 21 | 0.06137 |
| 44 | BioCarta | Induction of apoptosis through DR3 and DR4/5 Death Receptors                           | 28 | 0.25958 |
| 45 | BioCarta | Erk and PI-3 Kinase Are Necessary for Collagen Binding in Corneal Epithelia            | 21 | 0.10379 |
| 46 | BioCarta | Phospholipids as signalling intermediaries                                             | 22 | 0.25305 |
| 47 | BioCarta | EGF Signaling Pathway                                                                  | 26 | 0.48305 |
| 48 | BioCarta | Eicosanoid Metabolism                                                                  | 19 | 0.00768 |
| 49 | BioCarta | Regulation of eIF2                                                                     | 11 | 0.40084 |
| 50 | BioCarta | Regulation of eIF4e and p70 S6 Kinase                                                  | 18 | 0.46126 |
| 51 | BioCarta | Erythropoietin mediated neuroprotection through NF-kB                                  | 11 | 0.79853 |
| 52 | BioCarta | EPO Signaling Pathway                                                                  | 18 | 0.64074 |
| 53 | BioCarta | ER-associated degradation (ERAD) Pathway                                               | 12 | 0.97537 |
| 54 | BioCarta | Role of Erk5 in Neuronal Survival                                                      | 13 | 0.73916 |
| 55 | BioCarta | Erk1/Erk2 Mapk Signaling pathway                                                       | 28 | 0.88737 |
| 56 | BioCarta | Erythrocyte Differentiation Pathway                                                    | 13 | 0.34463 |
| 57 | BioCarta | METS affect on Macrophage Differentiation                                              | 16 | 0.31526 |
| 58 | BioCarta | Extrinsic Prothrombin Activation Pathway                                               | 11 | 0.12189 |
| 59 | BioCarta | FAS signaling pathway ( CD95 )                                                         | 30 | 0.77326 |
| 60 | BioCarta | Fc Epsilon Receptor I Signaling in Mast Cells                                          | 30 | 0.73474 |
| 61 | BioCarta | Fibrinolysis Pathway                                                                   | 10 | 0.36200 |

|    |          |                                                                                      |    |         |
|----|----------|--------------------------------------------------------------------------------------|----|---------|
| 62 | BioCarta | fMLP induced chemokine gene expression in HMC-1 cells                                | 25 | 0.57284 |
| 63 | BioCarta | Cell Cycle: G1/S Check Point                                                         | 26 | 0.52842 |
| 64 | BioCarta | Cell Cycle: G2/M Checkpoint                                                          | 21 | 0.35158 |
| 65 | BioCarta | Corticosteroids and cardioprotection                                                 | 14 | 0.95789 |
| 66 | BioCarta | Growth Hormone Signaling Pathway                                                     | 22 | 0.00084 |
| 67 | BioCarta | Ghrelin: Regulation of Food Intake and Energy Homeostasis                            | 13 | 0.11347 |
| 68 | BioCarta | Inhibition of Cellular Proliferation by Gleevec                                      | 20 | 0.43105 |
| 69 | BioCarta | Signaling Pathway from G-Protein Families                                            | 20 | 0.56105 |
| 70 | BioCarta | Adhesion and Diapedesis of Granulocytes                                              | 15 | 0.32726 |
| 71 | BioCarta | Inactivation of Gsk3 by AKT causes accumulation of b-catenin in Alveolar Macrophages | 25 | 0.66453 |
| 72 | BioCarta | Human Cytomegalovirus and Map Kinase Pathways                                        | 14 | 0.63737 |
| 73 | BioCarta | Control of skeletal myogenesis by HDAC & calcium/calmodulin-dependent kinase (CaMK)  | 16 | 0.70611 |
| 74 | BioCarta | Role of ERBB2 in Signal Transduction and Oncology                                    | 21 | 0.84905 |
| 75 | BioCarta | Segmentation Clock                                                                   | 13 | 0.07284 |
| 76 | BioCarta | Hypoxia-Inducible Factor in the Cardiovascular System                                | 15 | 0.57884 |
| 77 | BioCarta | HIV-1 Nef: negative effector of Fas and TNF                                          | 51 | 0.39242 |
| 78 | BioCarta | Stress Induction of HSP Regulation                                                   | 14 | 0.51400 |
| 79 | BioCarta | Chromatin Remodeling by hSWI/SNF ATP-dependent Complexes                             | 17 | 0.32200 |
| 80 | BioCarta | Skeletal muscle hypertrophy is regulated via AKT/mTOR pathway                        | 19 | 0.45168 |
| 81 | BioCarta | IGF-1 Signaling Pathway                                                              | 19 | 0.30716 |
| 82 | BioCarta | Multiple antiapoptotic pathways from IGF-1R signaling lead to BAD phosphorylation    | 16 | 0.26242 |
| 83 | BioCarta | IL12 and Stat4 Dependent Signaling Pathway in Th1 Development                        | 20 | 0.75042 |
| 84 | BioCarta | IL 17 Signaling Pathway                                                              | 16 | 0.47084 |
| 85 | BioCarta | Signal transduction through IL1R                                                     | 29 | 0.28642 |
| 86 | BioCarta | IL 2 signaling pathway                                                               | 21 | 0.16747 |
| 87 | BioCarta | IL-2 Receptor Beta Chain in T cell Activation                                        | 34 | 0.03632 |
| 88 | BioCarta | IL 5 Signaling Pathway                                                               | 10 | 0.68726 |
| 89 | BioCarta | IL 6 signaling pathway                                                               | 19 | 0.16305 |
| 90 | BioCarta | IL-7 Signal Transduction                                                             | 14 | 0.16884 |
| 91 | BioCarta | Cytokines and Inflammatory Response                                                  | 25 | 0.23811 |
| 92 | BioCarta | Insulin Signaling Pathway                                                            | 19 | 0.00916 |
| 93 | BioCarta | Integrin Signaling Pathway                                                           | 33 | 0.37716 |
| 94 | BioCarta | Intrinsic Prothrombin Activation Pathway                                             | 16 | 0.03737 |

|     |          |                                                                                  |    |         |
|-----|----------|----------------------------------------------------------------------------------|----|---------|
| 95  | BioCarta | Keratinocyte Differentiation                                                     | 37 | 0.79000 |
| 96  | BioCarta | Cells and Molecules involved in local acute inflammatory response                | 16 | 0.70505 |
| 97  | BioCarta | Lectin Induced Complement Pathway                                                | 10 | 0.79811 |
| 98  | BioCarta | Adhesion and Diapedesis of Lymphocytes                                           | 14 | 0.28411 |
| 99  | BioCarta | Role of MAL in Rho-Mediated Activation of SRF                                    | 19 | 0.40495 |
| 100 | BioCarta | MAPKinase Signaling Pathway                                                      | 81 | 0.57442 |
| 101 | BioCarta | mCalpain and friends in Cell motility                                            | 14 | 0.07347 |
| 102 | BioCarta | Role of MEF2D in T-cell Apoptosis                                                | 11 | 0.81589 |
| 103 | BioCarta | Signaling of Hepatocyte Growth Factor Receptor                                   | 33 | 0.00063 |
| 104 | BioCarta | Role of Mitochondria in Apoptotic Signaling                                      | 21 | 0.13653 |
| 105 | BioCarta | Monocyte and its Surface Molecules                                               | 10 | 0.48137 |
| 106 | BioCarta | How Progesterone Initiates the Oocyte Maturation                                 | 19 | 0.26737 |
| 107 | BioCarta | Downregulated of MTA-3 in ER-negative Breast Tumors                              | 13 | 0.78263 |
| 108 | BioCarta | mTOR Signaling Pathway                                                           | 19 | 0.44874 |
| 109 | BioCarta | PKC-catalyzed phosphorylation of inhibitory phosphoprotein of myosin phosphatase | 13 | 0.27516 |
| 110 | BioCarta | NFAT and Hypertrophy of the heart (Transcription in the broken heart)            | 36 | 0.23758 |
| 111 | BioCarta | NF-kB Signaling Pathway                                                          | 22 | 0.47737 |
| 112 | BioCarta | Nerve growth factor pathway (NGF)                                                | 16 | 0.43758 |
| 113 | BioCarta | Ras-Independent pathway in NK cell-mediated cytotoxicity                         | 17 | 0.59326 |
| 114 | BioCarta | Selective expression of chemokine receptors during T-cell polarization           | 24 | 0.38295 |
| 115 | BioCarta | Actions of Nitric Oxide in the Heart                                             | 16 | 0.95789 |
| 116 | BioCarta | NO2-dependent IL 12 Pathway in NK cells                                          | 12 | 0.63716 |
| 117 | BioCarta | NFkB activation by Nontypeable Hemophilus influenzae                             | 24 | 0.98611 |
| 118 | BioCarta | Nuclear Receptors in Lipid Metabolism and Toxicity                               | 33 | 0.53147 |
| 119 | BioCarta | p38 MAPK Signaling Pathway                                                       | 34 | 0.18526 |
| 120 | BioCarta | Hypoxia and p53 in the Cardiovascular system                                     | 22 | 0.07189 |
| 121 | BioCarta | p53 Signaling Pathway                                                            | 16 | 0.60116 |
| 122 | BioCarta | Thrombin signaling and protease-activated receptors                              | 16 | 0.55758 |
| 123 | BioCarta | PDGF Signaling Pathway                                                           | 24 | 0.38411 |
| 124 | BioCarta | Synaptic Proteins at the Synaptic Junction                                       | 17 | 0.40326 |
| 125 | BioCarta | Multi-step Regulation of Transcription by Pitx2                                  | 15 | 0.12358 |
| 126 | BioCarta | Regulation of transcriptional activity by PML                                    | 15 | 0.79421 |
| 127 | BioCarta | Mechanism of Gene Regulation by Peroxisome Proliferators via PPARa(alpha)        | 40 | 0.53421 |

|     |          |                                                                                       |    |         |
|-----|----------|---------------------------------------------------------------------------------------|----|---------|
| 128 | BioCarta | Prion Pathway                                                                         | 12 | 0.27853 |
| 129 | BioCarta | Presenilin action in Notch and Wnt signaling                                          | 13 | 0.07505 |
| 130 | BioCarta | Phosphoinositides and their downstream targets.                                       | 19 | 0.70168 |
| 131 | BioCarta | PTEN dependent cell cycle arrest and apoptosis                                        | 19 | 0.07042 |
| 132 | BioCarta | Rab GTPases Mark Targets In The Endocytotic Machinery                                 | 12 | 0.98347 |
| 133 | BioCarta | Rac 1 cell motility signaling pathway                                                 | 20 | 0.19053 |
| 134 | BioCarta | Influence of Ras and Rho proteins on G1 to S Transition                               | 24 | 0.73642 |
| 135 | BioCarta | Sumoylation by RanBP2 Regulates Transcriptional Repression                            | 11 | 0.26221 |
| 136 | BioCarta | Bone Remodelling                                                                      | 13 | 0.54442 |
| 137 | BioCarta | Nuclear receptors coordinate the activities of chromatin remodeling complexes and coa | 15 | 0.21453 |
| 138 | BioCarta | Ras Signaling Pathway                                                                 | 20 | 0.51505 |
| 139 | BioCarta | Acetylation and Deacetylation of RelA in The Nucleus                                  | 13 | 0.50337 |
| 140 | BioCarta | Rho cell motility signaling pathway                                                   | 23 | 0.60000 |
| 141 | BioCarta | Spliceosomal Assembly                                                                 | 14 | 0.86842 |
| 142 | BioCarta | Aspirin Blocks Signaling Pathway Involved in Platelet Activation                      | 18 | 0.21358 |
| 143 | BioCarta | Sprouty regulation of tyrosine kinase signals                                         | 15 | 0.05105 |
| 144 | BioCarta | Stathmin and breast cancer resistance to antimicrotubule agents                       | 12 | 0.22411 |
| 145 | BioCarta | Regulation of hematopoiesis by cytokines                                              | 15 | 0.04621 |
| 146 | BioCarta | Lck and Fyn tyrosine kinases in initiation of TCR Activation                          | 12 | 0.96253 |
| 147 | BioCarta | T Cytotoxic Cell Surface Molecules                                                    | 13 | 0.59274 |
| 148 | BioCarta | Telomeres, Telomerase, Cellular Aging, and Immortality                                | 18 | 0.99526 |
| 149 | BioCarta | Trefoil Factors Initiate Mucosal Healing                                              | 22 | 0.41884 |
| 150 | BioCarta | TGF beta signaling pathway                                                            | 17 | 0.78084 |
| 151 | BioCarta | Th1/Th2 Differentiation                                                               | 20 | 0.28926 |
| 152 | BioCarta | T Helper Cell Surface Molecules                                                       | 13 | 0.76368 |
| 153 | BioCarta | Chaperones modulate interferon Signaling Pathway                                      | 17 | 0.40453 |
| 154 | BioCarta | TNFR1 Signaling Pathway                                                               | 29 | 0.26884 |
| 155 | BioCarta | TNFR2 Signaling Pathway                                                               | 17 | 0.24989 |
| 156 | BioCarta | Role of Tob in T-cell activation                                                      | 15 | 0.46526 |
| 157 | BioCarta | Toll-Like Receptor Pathway                                                            | 36 | 0.68821 |
| 158 | BioCarta | TPO Signaling Pathway                                                                 | 19 | 0.60305 |
| 159 | BioCarta | Trka Receptor Signaling Pathway                                                       | 11 | 0.61411 |
| 160 | BioCarta | uCalpain and friends in Cell spread                                                   | 13 | 0.08863 |

|     |          |                                                                        |    |         |
|-----|----------|------------------------------------------------------------------------|----|---------|
| 161 | BioCarta | Control of Gene Expression by Vitamin D Receptor                       | 27 | 0.07547 |
| 162 | BioCarta | VEGF, Hypoxia, and Angiogenesis                                        | 15 | 0.33905 |
| 163 | BioCarta | Neuropeptides VIP and PACAP inhibit the apoptosis of activated T cells | 14 | 0.87253 |
| 164 | BioCarta | WNT Signaling Pathway                                                  | 24 | 0.05347 |
| 165 | KEGG     | Glycolysis / Gluconeogenesis                                           | 60 | 0.71137 |
| 166 | KEGG     | Citrate cycle (TCA cycle)                                              | 28 | 0.41347 |
| 167 | KEGG     | Pentose phosphate pathway                                              | 25 | 0.40042 |
| 168 | KEGG     | Pentose and glucuronate interconversions                               | 22 | 0.88800 |
| 169 | KEGG     | Fructose and mannose metabolism                                        | 37 | 0.31032 |
| 170 | KEGG     | Galactose metabolism                                                   | 26 | 0.26095 |
| 171 | KEGG     | Fatty acid metabolism                                                  | 46 | 0.26126 |
| 172 | KEGG     | Biosynthesis of steroids                                               | 24 | 0.19579 |
| 173 | KEGG     | Bile acid biosynthesis                                                 | 33 | 0.26621 |
| 174 | KEGG     | Androgen and estrogen metabolism                                       | 52 | 0.99074 |
| 175 | KEGG     | Oxidative phosphorylation                                              | 88 | 0.95232 |
| 176 | KEGG     | Urea cycle and metabolism of amino groups                              | 27 | 0.38884 |
| 177 | KEGG     | Pyrimidine metabolism                                                  | 89 | 0.42411 |
| 178 | KEGG     | Glutamate metabolism                                                   | 29 | 0.28368 |
| 179 | KEGG     | Alanine and aspartate metabolism                                       | 33 | 0.16116 |
| 180 | KEGG     | Glycine, serine and threonine metabolism                               | 41 | 0.90211 |
| 181 | KEGG     | Methionine metabolism                                                  | 21 | 0.06189 |
| 182 | KEGG     | Cysteine metabolism                                                    | 13 | 0.35947 |
| 183 | KEGG     | Valine, leucine and isoleucine degradation                             | 44 | 0.17032 |
| 184 | KEGG     | Lysine degradation                                                     | 42 | 0.34421 |
| 185 | KEGG     | Arginine and proline metabolism                                        | 32 | 0.91232 |
| 186 | KEGG     | Histidine metabolism                                                   | 40 | 0.48863 |
| 187 | KEGG     | Tyrosine metabolism                                                    | 56 | 0.47516 |
| 188 | KEGG     | Phenylalanine metabolism                                               | 25 | 0.60589 |
| 189 | KEGG     | gamma-Hexachlorocyclohexane degradation                                | 18 | 0.23842 |
| 190 | KEGG     | Tryptophan metabolism                                                  | 57 | 0.01105 |
| 191 | KEGG     | beta-Alanine metabolism                                                | 24 | 0.28421 |
| 192 | KEGG     | Aminophosphonate metabolism                                            | 17 | 0.21295 |
| 193 | KEGG     | Selenoamino acid metabolism                                            | 32 | 0.90021 |

|     |      |                                                       |    |         |
|-----|------|-------------------------------------------------------|----|---------|
| 194 | KEGG | Glutathione metabolism                                | 47 | 0.73516 |
| 195 | KEGG | Starch and sucrose metabolism                         | 46 | 0.85168 |
| 196 | KEGG | N-Glycan biosynthesis                                 | 44 | 0.53347 |
| 197 | KEGG | N-Glycan degradation                                  | 16 | 0.55589 |
| 198 | KEGG | O-Glycan biosynthesis                                 | 31 | 0.14905 |
| 199 | KEGG | Streptomycin biosynthesis                             | 10 | 0.03937 |
| 200 | KEGG | Aminosugars metabolism                                | 28 | 0.69842 |
| 201 | KEGG | Glycosaminoglycan degradation                         | 17 | 0.28326 |
| 202 | KEGG | Chondroitin sulfate biosynthesis                      | 21 | 0.99579 |
| 203 | KEGG | Keratan sulfate biosynthesis                          | 16 | 0.43284 |
| 204 | KEGG | Heparan sulfate biosynthesis                          | 20 | 0.53147 |
| 205 | KEGG | Glycerolipid metabolism                               | 49 | 0.06442 |
| 206 | KEGG | Inositol phosphate metabolism                         | 47 | 0.17368 |
| 207 | KEGG | Glycosylphosphatidylinositol(GPI)-anchor biosynthesis | 22 | 0.26126 |
| 208 | KEGG | Glycerophospholipid metabolism                        | 67 | 0.29505 |
| 209 | KEGG | Ether lipid metabolism                                | 31 | 0.89137 |
| 210 | KEGG | Arachidonic acid metabolism                           | 54 | 0.44874 |
| 211 | KEGG | Linoleic acid metabolism                              | 27 | 0.26821 |
| 212 | KEGG | alpha-Linolenic acid metabolism                       | 15 | 0.08411 |
| 213 | KEGG | Sphingolipid metabolism                               | 39 | 0.69116 |
| 214 | KEGG | Glycosphingolipid biosynthesis - neo-lactoseries      | 21 | 0.34189 |
| 215 | KEGG | Glycosphingolipid biosynthesis - globoseries          | 14 | 0.35611 |
| 216 | KEGG | Glycosphingolipid biosynthesis - ganglioseries        | 16 | 0.53084 |
| 217 | KEGG | Pyruvate metabolism                                   | 42 | 0.17832 |
| 218 | KEGG | 1- and 2-Methylnaphthalene degradation                | 18 | 0.45095 |
| 219 | KEGG | Glyoxylate and dicarboxylate metabolism               | 14 | 0.85905 |
| 220 | KEGG | Benzoate degradation via CoA ligation                 | 19 | 0.48811 |
| 221 | KEGG | Propanoate metabolism                                 | 34 | 0.20463 |
| 222 | KEGG | 3-Chloroacrylic acid degradation                      | 14 | 0.48158 |
| 223 | KEGG | Butanoate metabolism                                  | 35 | 0.05042 |
| 224 | KEGG | One carbon pool by folate                             | 15 | 0.86695 |
| 225 | KEGG | Carbon fixation                                       | 23 | 0.08811 |
| 226 | KEGG | Riboflavin metabolism                                 | 16 | 0.49979 |

|     |      |                                              |     |         |
|-----|------|----------------------------------------------|-----|---------|
| 227 | KEGG | Nicotinate and nicotinamide metabolism       | 23  | 0.25463 |
| 228 | KEGG | Pantothenate and CoA biosynthesis            | 14  | 0.58726 |
| 229 | KEGG | Folate biosynthesis                          | 36  | 0.06263 |
| 230 | KEGG | Retinol metabolism                           | 61  | 0.79547 |
| 231 | KEGG | Porphyrin and chlorophyll metabolism         | 38  | 0.86716 |
| 232 | KEGG | Limonene and pinene degradation              | 23  | 0.71653 |
| 233 | KEGG | Nitrogen metabolism                          | 23  | 0.47368 |
| 234 | KEGG | Sulfur metabolism                            | 12  | 0.60421 |
| 235 | KEGG | Alkaloid biosynthesis II                     | 19  | 0.72221 |
| 236 | KEGG | Aminoacyl-tRNA biosynthesis                  | 39  | 0.29411 |
| 237 | KEGG | Metabolism of xenobiotics by cytochrome P450 | 65  | 0.97937 |
| 238 | KEGG | Drug metabolism - cytochrome P450            | 67  | 0.91874 |
| 239 | KEGG | Drug metabolism - other enzymes              | 49  | 0.91316 |
| 240 | KEGG | Glycan structures - biosynthesis 2           | 62  | 0.45274 |
| 241 | KEGG | Glycan structures - degradation              | 30  | 0.55874 |
| 242 | KEGG | Biosynthesis of unsaturated fatty acids      | 23  | 0.20726 |
| 243 | KEGG | Neurodegenerative Diseases                   | 39  | 0.87863 |
| 244 | KEGG | ABC transporters                             | 44  | 0.79505 |
| 245 | KEGG | Ribosome                                     | 86  | 0.74568 |
| 246 | KEGG | RNA polymerase                               | 25  | 0.10674 |
| 247 | KEGG | Basal transcription factors                  | 32  | 0.85716 |
| 248 | KEGG | DNA replication                              | 36  | 0.51958 |
| 249 | KEGG | Proteasome                                   | 22  | 0.13779 |
| 250 | KEGG | Protein export                               | 12  | 0.90105 |
| 251 | KEGG | PPAR signaling pathway                       | 67  | 0.93979 |
| 252 | KEGG | Base excision repair                         | 34  | 0.29979 |
| 253 | KEGG | Nucleotide excision repair                   | 41  | 0.53126 |
| 254 | KEGG | Mismatch repair                              | 23  | 0.27021 |
| 255 | KEGG | Homologous recombination                     | 28  | 0.12358 |
| 256 | KEGG | Non-homologous end-joining                   | 13  | 0.32211 |
| 257 | KEGG | ErbB signaling pathway                       | 86  | 0.02463 |
| 258 | KEGG | Phosphatidylinositol signaling system        | 75  | 0.04274 |
| 259 | KEGG | Cell cycle                                   | 101 | 0.97000 |



|     |      |                                           |     |         |
|-----|------|-------------------------------------------|-----|---------|
| 260 | KEGG | p53 signaling pathway                     | 66  | 0.45211 |
| 261 | KEGG | SNARE interactions in vesicular transport | 36  | 0.59611 |
| 262 | KEGG | Regulation of autophagy                   | 29  | 0.53968 |
| 263 | KEGG | mTOR signaling pathway                    | 49  | 0.89084 |
| 264 | KEGG | Apoptosis                                 | 82  | 0.39526 |
| 265 | KEGG | Notch signaling pathway                   | 45  | 0.50305 |
| 266 | KEGG | Hedgehog signaling pathway                | 55  | 0.06411 |
| 267 | KEGG | TGF-beta signaling pathway                | 87  | 0.63137 |
| 268 | KEGG | VEGF signaling pathway                    | 71  | 0.75000 |
| 269 | KEGG | ECM-receptor interaction                  | 86  | 0.98453 |
| 270 | KEGG | Adherens junction                         | 75  | 0.49474 |
| 271 | KEGG | Gap junction                              | 91  | 0.66484 |
| 272 | KEGG | Complement and coagulation cascades       | 68  | 0.66800 |
| 273 | KEGG | Antigen processing and presentation       | 78  | 0.74421 |
| 274 | KEGG | Renin-angiotensin system                  | 17  | 0.60137 |
| 275 | KEGG | Toll-like receptor signaling pathway      | 101 | 0.91568 |
| 276 | KEGG | Hematopoietic cell lineage                | 79  | 0.21337 |
| 277 | KEGG | T cell receptor signaling pathway         | 92  | 0.56516 |
| 278 | KEGG | B cell receptor signaling pathway         | 63  | 0.61653 |
| 279 | KEGG | Fc epsilon RI signaling pathway           | 75  | 0.59884 |
| 280 | KEGG | Circadian rhythm                          | 13  | 0.60495 |
| 281 | KEGG | Long-term potentiation                    | 69  | 0.76758 |
| 282 | KEGG | Long-term depression                      | 76  | 0.58358 |
| 283 | KEGG | Taste transduction                        | 46  | 0.40000 |
| 284 | KEGG | GnRH signaling pathway                    | 97  | 0.59242 |
| 285 | KEGG | Melanogenesis                             | 98  | 0.03768 |
| 286 | KEGG | Adipocytokine signaling pathway           | 67  | 0.26737 |
| 287 | KEGG | Type II diabetes mellitus                 | 44  | 0.47337 |
| 288 | KEGG | Type I diabetes mellitus                  | 40  | 0.52347 |
| 289 | KEGG | Maturity onset diabetes of the young      | 24  | 0.03853 |
| 290 | KEGG | Alzheimers disease                        | 28  | 0.67768 |
| 291 | KEGG | Parkinsons disease                        | 19  | 0.06042 |
| 292 | KEGG | Amyotrophic lateral sclerosis (ALS)       | 19  | 0.44653 |

|     |      |                                                            |    |         |
|-----|------|------------------------------------------------------------|----|---------|
| 293 | KEGG | Huntingtons disease                                        | 32 | 0.69126 |
| 294 | KEGG | Dentatorubropallidoluysian atrophy (DRPLA)                 | 15 | 0.44358 |
| 295 | KEGG | Prion disease                                              | 14 | 0.32905 |
| 296 | KEGG | Vibrio cholerae infection                                  | 57 | 0.58305 |
| 297 | KEGG | Epithelial cell signaling in Helicobacter pylori infection | 68 | 0.93800 |
| 298 | KEGG | Pathogenic Escherichia coli infection - EHEC               | 47 | 0.46200 |
| 299 | KEGG | Pathogenic Escherichia coli infection - EPEC               | 47 | 0.46200 |
| 300 | KEGG | Colorectal cancer                                          | 83 | 0.67432 |
| 301 | KEGG | Renal cell carcinoma                                       | 68 | 0.41421 |
| 302 | KEGG | Pancreatic cancer                                          | 73 | 0.88821 |
| 303 | KEGG | Endometrial cancer                                         | 52 | 0.17968 |
| 304 | KEGG | Glioma                                                     | 64 | 0.70011 |
| 305 | KEGG | Prostate cancer                                            | 88 | 0.62832 |
| 306 | KEGG | Thyroid cancer                                             | 29 | 0.58684 |
| 307 | KEGG | Basal cell carcinoma                                       | 53 | 0.00463 |
| 308 | KEGG | Melanoma                                                   | 70 | 0.57968 |
| 309 | KEGG | Bladder cancer                                             | 42 | 0.87737 |
| 310 | KEGG | Chronic myeloid leukemia                                   | 76 | 0.74863 |
| 311 | KEGG | Acute myeloid leukemia                                     | 57 | 0.54516 |
| 312 | KEGG | Small cell lung cancer                                     | 87 | 0.54979 |
| 313 | KEGG | Non-small cell lung cancer                                 | 54 | 0.55189 |
| 314 | KEGG | Asthma                                                     | 27 | 0.29484 |
| 315 | KEGG | Autoimmune thyroid disease                                 | 49 | 0.46537 |
| 316 | KEGG | Systemic lupus erythematosus                               | 74 | 0.56253 |
| 317 | KEGG | Allograft rejection                                        | 34 | 0.38705 |
| 318 | KEGG | Graft-versus-host disease                                  | 35 | 0.37032 |
| 319 | KEGG | Primary immunodeficiency                                   | 34 | 0.36853 |
| 320 | PID  | Paxillin-dependent events mediated by a4b1                 | 19 | 0.87000 |
| 321 | PID  | Paxillin-independent events mediated by a4b1 and a4b7      | 23 | 0.06589 |
| 322 | PID  | a6b1 and a6b4 Integrin signaling                           | 42 | 0.90621 |
| 323 | PID  | Alpha-synuclein signaling                                  | 32 | 0.36589 |
| 324 | PID  | amb2 Integrin signaling                                    | 58 | 0.45705 |
| 325 | PID  | Angiopoietin receptor Tie2-mediated signaling              | 45 | 0.43716 |

|     |     |                                                    |    |         |
|-----|-----|----------------------------------------------------|----|---------|
| 326 | PID | Cellular roles of Anthrax toxin                    | 16 | 0.95200 |
| 327 | PID | ADP-ribosylation factor 1 pathway                  | 15 | 0.20821 |
| 328 | PID | Aurora A signaling                                 | 29 | 0.69021 |
| 329 | PID | Aurora B signaling                                 | 34 | 0.50400 |
| 330 | PID | Integrins in angiogenesis                          | 47 | 0.30495 |
| 331 | PID | Osteopontin-mediated events                        | 31 | 0.78789 |
| 332 | PID | BARD1 signaling events                             | 27 | 0.24695 |
| 333 | PID | BCR signaling pathway                              | 63 | 0.65768 |
| 334 | PID | BMP Signaling                                      | 38 | 0.17821 |
| 335 | PID | Caspase cascade in apoptosis                       | 51 | 0.30821 |
| 336 | PID | Downstream signaling in naïve CD8+ T cells         | 65 | 0.92042 |
| 337 | PID | TCR signaling in naïve CD8+ T cells                | 52 | 0.24200 |
| 338 | PID | Ceramide signaling pathway                         | 45 | 0.53053 |
| 339 | PID | Circadian rhythm pathway                           | 13 | 0.47895 |
| 340 | PID | Visual signal transduction: Cones                  | 19 | 0.12379 |
| 341 | PID | Endothelins                                        | 66 | 0.70842 |
| 342 | PID | EPO signaling pathway                              | 34 | 0.33621 |
| 343 | PID | FAS signaling pathway (CD95)                       | 35 | 0.78600 |
| 344 | PID | Fc-epsilon receptor I signaling in mast cells      | 60 | 0.44726 |
| 345 | PID | FGF signaling pathway                              | 52 | 0.02274 |
| 346 | PID | FoxO family signaling                              | 46 | 0.32684 |
| 347 | PID | Signaling events mediated by HDAC Class I          | 56 | 0.43653 |
| 348 | PID | Signaling events mediated by HDAC Class II         | 31 | 0.39337 |
| 349 | PID | Signaling events mediated by HDAC Class III        | 24 | 0.55432 |
| 350 | PID | Signaling events mediated by the Hedgehog family   | 22 | 0.84789 |
| 351 | PID | Hedgehog signaling events mediated by Gli proteins | 43 | 0.26547 |
| 352 | PID | HIV-1 Nef: Negative effector of Fas and TNF-alpha  | 35 | 0.42453 |
| 353 | PID | IFN-gamma pathway                                  | 41 | 0.25863 |
| 354 | PID | IGF1 pathway                                       | 30 | 0.26674 |
| 355 | PID | IL12-mediated signaling events                     | 61 | 0.71221 |
| 356 | PID | IL12 signaling mediated by STAT4                   | 33 | 0.88179 |
| 357 | PID | IL1-mediated signaling events                      | 32 | 0.91432 |
| 358 | PID | IL2-mediated signaling events                      | 54 | 0.59632 |

|     |     |                                                                         |    |         |
|-----|-----|-------------------------------------------------------------------------|----|---------|
| 359 | PID | IL2 signaling events mediated by PI3K                                   | 35 | 0.41505 |
| 360 | PID | IL2 signaling events mediated by STAT5                                  | 30 | 0.44716 |
| 361 | PID | IL23-mediated signaling events                                          | 34 | 0.86600 |
| 362 | PID | IL27-mediated signaling events                                          | 23 | 0.63621 |
| 363 | PID | IL4-mediated signaling events                                           | 60 | 0.28726 |
| 364 | PID | IL6-mediated signaling events                                           | 44 | 0.72526 |
| 365 | PID | Insulin-mediated glucose transport                                      | 24 | 0.08642 |
| 366 | PID | Insulin Pathway                                                         | 39 | 0.52042 |
| 367 | PID | Signaling events mediated by Stem cell factor receptor (c-Kit)          | 50 | 0.00979 |
| 368 | PID | Lissencephaly gene (LIS1) in neuronal migration and development         | 25 | 0.81621 |
| 369 | PID | LPA4-mediated signaling events                                          | 15 | 0.75368 |
| 370 | PID | VEGFR3 signaling in lymphatic endothelium                               | 24 | 0.63389 |
| 371 | PID | LPA receptor mediated events                                            | 64 | 0.68821 |
| 372 | PID | Trk receptor signaling mediated by the MAPK pathway                     | 33 | 0.83000 |
| 373 | PID | Signaling events activated by Hepatocyte Growth Factor Receptor (c-Met) | 52 | 0.17168 |
| 374 | PID | mTOR signaling pathway                                                  | 24 | 0.08326 |
| 375 | PID | Role of Calcineurin-dependent NFAT signaling in lymphocytes             | 48 | 0.06011 |
| 376 | PID | Calcineurin-regulated NFAT-dependent transcription in lymphocytes       | 44 | 0.53463 |
| 377 | PID | Atypical NF-kappaB pathway                                              | 16 | 0.90895 |
| 378 | PID | Canonical NF-kappaB pathway                                             | 23 | 0.41611 |
| 379 | PID | p38 signaling mediated by MAPKAP kinases                                | 19 | 0.34432 |
| 380 | PID | p38 MAPK signaling pathway                                              | 26 | 0.19726 |
| 381 | PID | Signaling mediated by p38-alpha and p38-beta                            | 36 | 0.80453 |
| 382 | PID | Regulation of p38-alpha and p38-beta                                    | 30 | 0.18600 |
| 383 | PID | Signaling mediated by p38-gamma and p38-delta                           | 9  | 0.44505 |
| 384 | PID | p75(NTR)-mediated signaling                                             | 63 | 0.99305 |
| 385 | PID | PDGFR-alpha signaling pathway                                           | 24 | 0.93211 |
| 386 | PID | PDGFR-beta signaling pathway                                            | 51 | 0.39347 |
| 387 | PID | Class I PI3K signaling events mediated by Akt                           | 40 | 0.06200 |
| 388 | PID | Class I PI3K signaling events                                           | 51 | 0.32958 |
| 389 | PID | Trk receptor signaling mediated by PI3K and PLC-gamma                   | 32 | 0.27389 |
| 390 | PID | Signaling events mediated by PRL                                        | 19 | 0.69621 |
| 391 | PID | Presenilin action in Notch and Wnt signaling                            | 41 | 0.23611 |

|     |     |                                                            |    |         |
|-----|-----|------------------------------------------------------------|----|---------|
| 392 | PID | Signaling events mediated by PTP1B                         | 49 | 0.06411 |
| 393 | PID | Sumoylation by RanBP2 regulates transcriptional repression | 11 | 0.28105 |
| 394 | PID | Reelin signaling pathway                                   | 25 | 0.83368 |
| 395 | PID | Signaling events regulated by Ret tyrosine kinase          | 34 | 0.21295 |
| 396 | PID | Retinoic acid receptors-mediated signaling                 | 26 | 0.93653 |
| 397 | PID | Visual signal transduction: Rods                           | 20 | 0.61968 |
| 398 | PID | RXR and RAR heterodimerization with other nuclear receptor | 21 | 0.11547 |
| 399 | PID | Sphingosine 1-phosphate (S1P) pathway                      | 19 | 0.43484 |
| 400 | PID | S1P1 pathway                                               | 19 | 0.09684 |
| 401 | PID | S1P2 pathway                                               | 24 | 0.63105 |
| 402 | PID | S1P3 pathway                                               | 27 | 0.47653 |
| 403 | PID | S1P4 pathway                                               | 14 | 0.75137 |
| 404 | PID | Regulation of nuclear SMAD2/3 signaling                    | 76 | 0.80168 |
| 405 | PID | Regulation of cytoplasmic and nuclear SMAD2/3 signaling    | 17 | 0.64284 |
| 406 | PID | Syndecan-1-mediated signaling events                       | 13 | 0.00053 |
| 407 | PID | Syndecan-2-mediated signaling events                       | 33 | 0.34200 |
| 408 | PID | Syndecan-3-mediated signaling events                       | 16 | 0.13968 |
| 409 | PID | Syndecan-4-mediated signaling events                       | 31 | 0.31021 |
| 410 | PID | Calcium signaling in the CD4+ TCR pathway                  | 29 | 0.26242 |
| 411 | PID | JNK signaling in the CD4+ TCR pathway                      | 13 | 0.81663 |
| 412 | PID | TCR signaling in naïve CD4+ T cells                        | 66 | 0.21453 |
| 413 | PID | Ras signaling in the CD4+ TCR pathway                      | 14 | 0.80916 |
| 414 | PID | Regulation of Telomerase                                   | 62 | 0.76505 |
| 415 | PID | TGF-beta receptor signaling                                | 49 | 0.38589 |
| 416 | PID | Neurotrophic factor-mediated Trk receptor signaling        | 61 | 0.12337 |
| 417 | PID | Thromboxane A2 receptor signaling                          | 53 | 0.53505 |
| 418 | PID | Signaling events mediated by VEGFR1 and VEGFR2             | 61 | 0.17568 |
| 419 | PID | VEGFR1 specific signals                                    | 26 | 0.58411 |
| 420 | PID | Noncanonical Wnt signaling pathway                         | 18 | 0.65063 |
| 421 | PID | Canonical Wnt signaling pathway                            | 34 | 0.26768 |

\* p-value is for the significance of the enrichment score (ES) based on 10,000 permutations
