# Supplementary material
Source: PubMed Central journal article supplement (PMC2907250)
Supplement: NIHMS214831-supplement-Supplemental_Table_2.pdf [file NIHMS214831-supplement-Supplemental_Table_2.pdf]

Supplemental Table 2: Genes previously associated with breast cancer risk in GWAS

| Associated SNP* | Study                    | Associated Gene | location   | Smallest p-value in CGEMS <sup>§</sup> | minP in CGEMS <sup>†</sup> |
|-----------------|--------------------------|-----------------|------------|----------------------------------------|----------------------------|
| rs1045485       | BCAC <sup>(1)</sup>      | CASP8           | 2q33-34    | 0.0843                                 | 0.4801                     |
| rs4973768       | CGEMS-III <sup>(2)</sup> | SLC4A7          | 3p24       | 0.0060                                 | 0.0549                     |
| rs7716600       | deCODE <sup>(3)</sup>    | MRPS30          | 5p12       | 0.0090                                 | <b>0.0187</b>              |
| rs4415084       | CGEMS-II <sup>(4)</sup>  |                 |            |                                        |                            |
| rs889312        | Cambridge <sup>(5)</sup> | MAP3K1          | 5q11.2     | 0.0209                                 | 0.1546                     |
| rs16886165      | CGEMS-II <sup>(4)</sup>  |                 |            |                                        |                            |
| rs1219648       | CGEMS-I <sup>(6)</sup>   | FGFR2           | 10q25.3-26 | 1.62 x 10 <sup>-6</sup>                | <b>0.0002</b>              |
| rs2981582       | Cambridge <sup>(5)</sup> |                 |            |                                        |                            |
| rs2981579       | CGEMS-II <sup>(4)</sup>  |                 |            |                                        |                            |
| rs3817198       | Cambridge <sup>(5)</sup> | LSP1            | 11p15.5    | 0.0343                                 | 0.3847                     |
| rs3817198       | CGEMS-II <sup>(4)</sup>  |                 |            |                                        |                            |
| rs999737        | CGEMS-II <sup>(4)</sup>  | RAD51L1         | 14q23-24   | 0.0066                                 | 0.3615                     |
| rs12443621      | Cambridge <sup>(5)</sup> | TOX3<br>(TNRC9) | 16q12.1    | 0.0222                                 | 0.2615                     |
| rs3803662       | deCODE <sup>(3)</sup>    |                 |            |                                        |                            |
| rs3803662       | CGEMS-II <sup>(4)</sup>  |                 |            |                                        |                            |
| rs6504950       | CGEMS-III <sup>(2)</sup> | COX11           | 17q23.2    | 0.0663                                 | 0.2734                     |
| rs6504950       | CGEMS-III <sup>(2)</sup> | STXBP4          | 17q23.2    | 0.0677                                 | 0.7514                     |
| rs1982073       | BCAC <sup>(1)</sup>      | TGFB1           | 19q13.1    | 0.0079                                 | <b>0.0355</b>              |

\* The SNP that was associated with breast cancer risk in the original study.

§ The smallest p-value of a SNP trend test among all SNPs that are within the boundaries of 20kb 5' and 10kb 3' of the gene's coding region

† Adjusted minimal p-value calculated as the fraction of times the observed minimal p-value within a gene is smaller than the minimal p-value in 10,000 permutations.

Studies:

1. Cox A, Dunning AM, Garcia-Closas M, et al. A common coding variant in CASP8 is associated with breast cancer risk. *Nature genetics* 2007; 39: 352-8.
2. Ahmed S, Thomas G, Ghoussaini M, et al. Newly discovered breast cancer susceptibility loci on 3p24 and 17q23.2. *Nature genetics* 2009; 41: 585-90.
3. Stacey SN, Manolescu A, Sulem P, et al. Common variants on chromosomes 2q35 and 16q12 confer susceptibility to estrogen receptor-positive breast cancer. *Nature genetics* 2007; 39: 865-9.
4. Thomas G, Jacobs KB, Kraft P, et al. A multistage genome-wide association study in breast cancer identifies two new risk alleles at 1p11.2 and 14q24.1 (RAD51L1). *Nature genetics* 2009; 41: 579-84.
5. Easton DF, Pooley KA, Dunning AM, et al. Genome-wide association study identifies novel breast cancer susceptibility loci. *Nature* 2007; 447: 1087-93.
6. Hunter DJ, Kraft P, Jacobs KB, et al. A genome-wide association study identifies alleles in FGFR2 associated with risk of sporadic postmenopausal breast cancer. *Nature genetics* 2007; 39: 870-4.
